# Supplementary material for: 1,8-Naphthalimide appended propiolate-based fluorescent sensor for selective detection of cysteine over glutathione and homocysteine in living cells
Source: Royal Society of Chemistry journal article supplement (doi:10.1039/d1nj03317d), 2021-01-01
Supplement: d1nj03317d1.pdf [file d1nj03317d1.pdf]

## **Supporting information**

### **1,8-naphthalimide appended propiolate-based fluorescent sensor for selective detection of cysteine over glutathione and homocysteine in living cells**

**Duygu Aydin<sup>a\*</sup>, Sukriye Nihan Karuk Elmas<sup>a</sup>, Gonul Akin Geyik<sup>a</sup>, Aykut Bostanci<sup>b</sup>, Fatma Nur Arslan<sup>a</sup>, Tahir Savran<sup>a</sup>, Gokhan Sadi<sup>b</sup>, Ibrahim Yilmaz<sup>a</sup>**

<sup>a</sup> *Department of Chemistry, Kamil Ozdag Science Faculty, Karamanoglu Mehmetbey University, 70100, Karaman, Turkey*

<sup>b</sup> *Department of Biology, Kamil Ozdag Science Faculty, Karamanoglu Mehmetbey University, 70100, Karaman, Turkey*

---

\*Corresponding Author: Dr. Duygu Aydin

Address: <sup>a</sup>Karamanoglu Mehmetbey University, Kamil Ozdag Science Faculty,  
Department of Chemistry, 70100, Karaman, Turkiye

Tel: +90 338 226 00 00/3861

E-mail: [duyguaydin@kmu.edu.tr](mailto:duyguaydin@kmu.edu.tr)

- Fig S1.**  $^1\text{H}$ -NMR spectrum of the compound **2a** in  $\text{CDCl}_3-d_6$
- Fig S2.**  $^{13}\text{C}$ -NMR spectrum of the compound **2a** in  $\text{CDCl}_3-d_6$
- Fig S3.**  $^1\text{H}$ -NMR spectrum of the compound **3a** in  $\text{CDCl}_3-d_6$
- Fig S4.**  $^{13}\text{C}$ -NMR spectrum of the compound **3a** in  $\text{CDCl}_3-d_6$
- Fig S5.**  $^1\text{H}$ -NMR spectrum of the compound **4a** in  $\text{CDCl}_3-d_6$
- Fig S6.**  $^{13}\text{C}$ -NMR spectrum of the compound **4a** in  $\text{CDCl}_3-d_6$
- Fig S7.**  $^1\text{H}$ -NMR spectrum of the **NASP** in  $\text{DMSO}-d_6$
- Fig S8.**  $^{13}\text{C}$ -NMR spectrum of the **NASP** in  $\text{DMSO}-d_6$
- Fig S9.** MALDI-TOF MS spectra of the **NASP**
- Fig S10.** The fluorescence emission spectra of the **NASP**, **NASP-Cys** and **NASP-Hcy (a)** in different solvents and **(b)** EtOH-water mixture study in different ratios for the **NASP** in the presence and absence of Cys or Hcy
- Fig S11.** Spectra of the **NASP** (5.0  $\mu\text{M}$ ) in the presence of Hcy (0.0–70.0 equiv) in EtOH:H<sub>2</sub>O (90:10, v:v, 0.0670 M PBS buffer pH=7.0) media, LOD plot of the **NASP** versus Hcy concentrations.
- Fig S12.** Pareto's diagram of the proposed method for Cys and Hcy
- Fig S13.** The emission intensity of the chemoprobe **NASP** (5.0  $\mu\text{M}$ ) with competitive amino acids (*Asn, Trp, Phe, Ser, Thr, Met, Pro, Gly, Tyr, Val, Ala, Lys, Arg, His, Ile, GSH*)(70 equiv., 0.350 mM) (blue bar) and the emission intensity of **NASP** (5.0  $\mu\text{M}$ ) in the presence of and 70 equiv. other competitive analytes and 70 equiv. Hcy (0.350 mM) in EtOH:H<sub>2</sub>O (90:10, v:v, 0.0670 M PBS buffer pH=7.0) media
- Fig S14.** Response time experiments of the chemoprobe **NASP** (5.0  $\mu\text{M}$ ) in the presence of Cys, and Hcy in EtOH:H<sub>2</sub>O (90:10, v:v, 0.0670 M PBS buffer pH=7.0) media
- Fig S15.** pH study of the **NASP** with or without Cys/Hcy at pH = 4-10
- Fig S16.** In vitro cytotoxic effects of **NASP** on THLE2 **(a)** and HepG2 **(b)** cells for 24-h incubation. Data presented the mean of at least triplicate measurements and given as mean  $\pm$ standard error of the mean. The  $\text{IC}_{50}$  value for the 24-h incubation was calculated as  $105.6 \pm 1.04 \mu\text{M}$  for THLE2 cells and  $109.3 \pm 1.03 \mu\text{M}$  for HepG2 cells.

- Scheme S1.** Proposed mechanism for the recognition of homocysteine
- Table S1.** Nominal parameters specified during the assessment of the proposed method for Cys and Hcy
- Table S2.** Parameters used in the robustness analysis of the proposed method for Cys and Hcy
- Table S3.** Factorial combinations used in the Youden test of robustness analysis of the proposed method for Cys and Hcy
- Table S4.** Dixon's test utilized to the repeatability of the proposed method for Cys and Hcy
- Table S5.** Intermediate precision analysis of the proposed method for Cys and Hcy verified by the HorRat ratio

## Experimental Section

**Synthesis of 4-Bromo-N-butyl-1,8-naphthalimide (2a).** Compound **2a** (0.5 g, 1.80 mmol) and n-butylamine (0.69 g, 9.55 mmol) was refluxed for 6h in 20 mL glacial acetic acid. After cooling, the suspension was put into ice-water (250 mL), and then filtered to obtain a yellow solid. The precipitate was washed with excess H<sub>2</sub>O and then re-crystallized from acetic acid gave a pale yellow crystal (yield: 79.3%).

<sup>1</sup>H-NMR (600 MHz, CDCl<sub>3</sub>): δ 8.61 (d, J = 7.2 Hz, 1H), 8.50(d, J = 8.4 Hz, 1H), 8.36 (d, J = 7.8 Hz, 1H), 7.99 (d, J = 7.8 Hz, 1H), 7.80 (t, J = 7.6 Hz, 1H), 4.17 (t, J = 7.6 Hz, 2H), 1.76–1.68 (m, 2H), 1.44 (dt, J = 7.4 Hz, 2H), 0.97 (t, J = 7.4 Hz, 3H). <sup>13</sup>C-NMR (150 MHz, CDCl<sub>3</sub>): δ 163.66, 133.23, 132.02, 131.22, 131.09, 130.64, 130.20, 129.02, 128.08, 123.16, 122.30, 40.38, 30.16, 20.37, 13.84.

**Synthesis of 4-hydrazine hydrate N-butyl-1,8-naphthalic anhydride (3a).** A mixture of compound **2a** (8.0 g, 24.08 mmol) and hydrazine hydrate (7.62 g, 85%, v/v) in ethylene glycol mono methyl ether (93 mL) was refluxed for 24 h. After cooling, the mixture was put into 180 mL of ice-H<sub>2</sub>O, the precipitate was filtered and dried in vacuum to obtain a red precipitate (yield: 80.3%).

<sup>1</sup>H-NMR (600 MHz, CDCl<sub>3</sub>) δ 9.08 (s, 1H), 8.57 (d, J = 8.3 Hz, 1H), 8.37 (d, J = 7.2 Hz, 1H), 8.25 (d, J = 8.5 Hz, 1H), 7.59 (t, J = 7.8 Hz, 1H), 7.21 (d, J = 8.6 Hz, 1H), 4.64 (s, 2H), 3.98 (t, J = 7.3 Hz, 2H), 1.58–1.52 (m, 2H), 1.34–1.27 (m, 2H), 0.89 (t, J = 7.3 Hz, 3H). <sup>13</sup>C-NMR (150 MHz, CDCl<sub>3</sub>) δ 164.17, 163.32, 153.60, 134.61, 130.97, 129.70, 128.64, 124.52, 122.15, 118.84, 107.78, 104.41, 39.46, 30.28, 20.30, 14.20.

**Synthesis of 2-formylphenyl propiolate (4a).** The propiolate derivative **4a** was prepared by the DCC/DMAP esterification reaction of salicyl aldehyde with propiolic acid. Briefly, to an

ice cooled and stirred solution of propiolic acid (315.4 mg, 4.50 mmol) and salicyl aldehyde (500 mg, 4.09 mmol) in DCM (dry) was added dropwise to the solution of dimethylaminopyridine (DMAP, 3.75 mg, 0.03 mmol) and *N,N'*-dicyclohexylcarbodiimide (DCC, 929 mg, 4.05 mmol) in DCM (dry, 12 mL) during 1 h under  $N_2$  atmosphere. Afterward, the mixture was stirred and kept at rt for 20 h, and then filtered to get rid of the insoluble byproduct *N,N'*-dicyclohexylurea. The combined filtrate was washed with 1.0 N HCl followed by washing with brine and dried utilizing anhydrous  $Na_2SO_4$ . The solvent was get rid of to give the crude product that was then purified by CC utilizing EtOAc: hexane (1:9, v/v) to give **4a** (90 %).

$^1H$  NMR (600 MHz,  $CDCl_3$ )  $\delta$  9.90 (s, 1H), 7.58–7.51 (m, 2H), 7.05–6.97 (m, 2H), 3.03 (s, 1H).  $^{13}C$ -NMR (150 MHz,  $CDCl_3$ )  $\delta$  195.80, 160.56, 155.38, 136.15, 132.81, 119.56, 118.91, 116.60, 76.06, 72.96.

***Preparation of 2-formylphenyl propiolate appended-N-butyl-1,8-naphthalimide (NASP).***

An ethanolic solution of **4a** (0.23 g, 1.32 mmol) was carefully transferred to **3a** solution (0.37 g, 1.32 mmol) in EtOH (anhydrous, 3 mL). Acetic acid (2–3 drops) was transferred to the mixture, which was then refluxed at 80 °C for 24h. The orange solid formed was filtered and washed several times with cold EtOH. The product was dried under vacuum to give the probe **NASP** (71 %). Found (m/z): 437.810 and calculated (m/z): 439.15 for [**NASP**].

$^1H$  NMR (600 MHz,  $DMSO-d_6$ )  $\delta$  11.45 (s, 1H), 8.79 (s, 1H), 8.78 (s, 1H), 8.45 (d,  $J = 7.2$  Hz, 1H), 8.35 (d,  $J = 8.4$  Hz, 1H), 7.83 (d,  $J = 7.7$  Hz, 1H), 7.75 (t,  $J = 7.8$  Hz, 1H), 7.61 (d,  $J = 8.4$  Hz, 1H), 7.24 (t,  $J = 7.6$  Hz, 1H), 6.90 (dd,  $J = 16.6, 8.1$  Hz, 2H), 4.35 (s, 1H), 4.00 (t,  $J = 7.4$  Hz, 2H), 1.61–1.54 (m, 2H), 1.36–1.29 (m, 2H), 0.90 (t,  $J = 7.3$  Hz, 3H).  $^{13}C$  NMR (150 MHz,  $DMSO-d_6$ )  $\delta$  164.08, 163.37, 156.68, 154.02, 146.76, 142.31, 134.03, 131.30, 129.59,

128.72, 126.77, 125.40, 122.40, 120.98, 119.98, 119.01, 116.58, 111.16, 106.87, 77.76, 76.54,  
30.23, 20.29, 14.20. Found (m/z): 437.810 and calculated (m/z): 439.15 for [NASP].

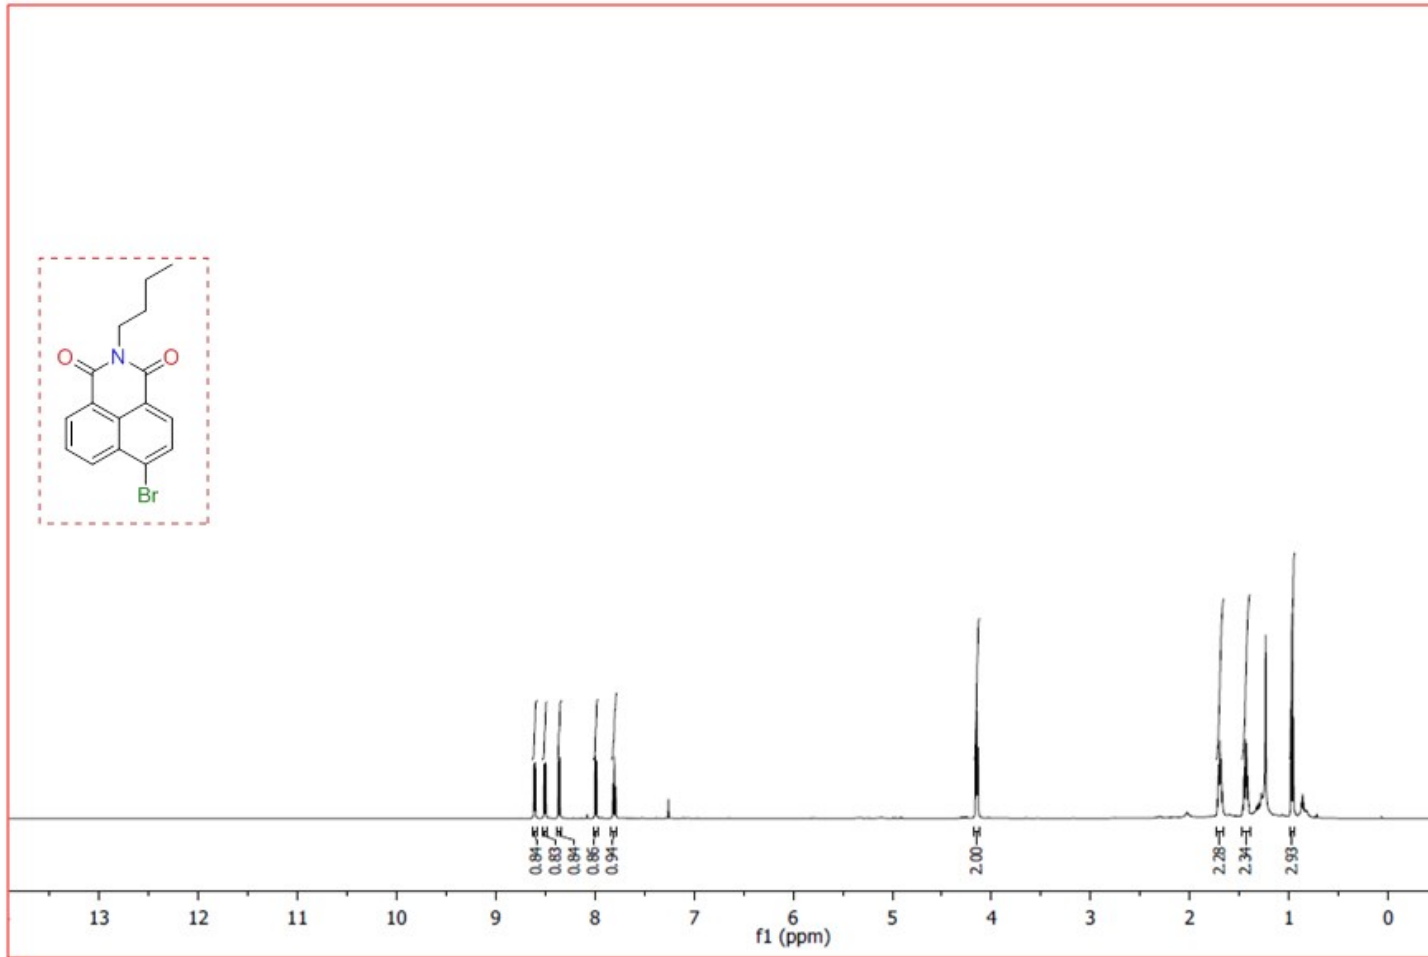

**Fig S1.**  $^1\text{H-NMR}$  spectrum of the compound **2a** in  $\text{CDCl}_3-d_6$

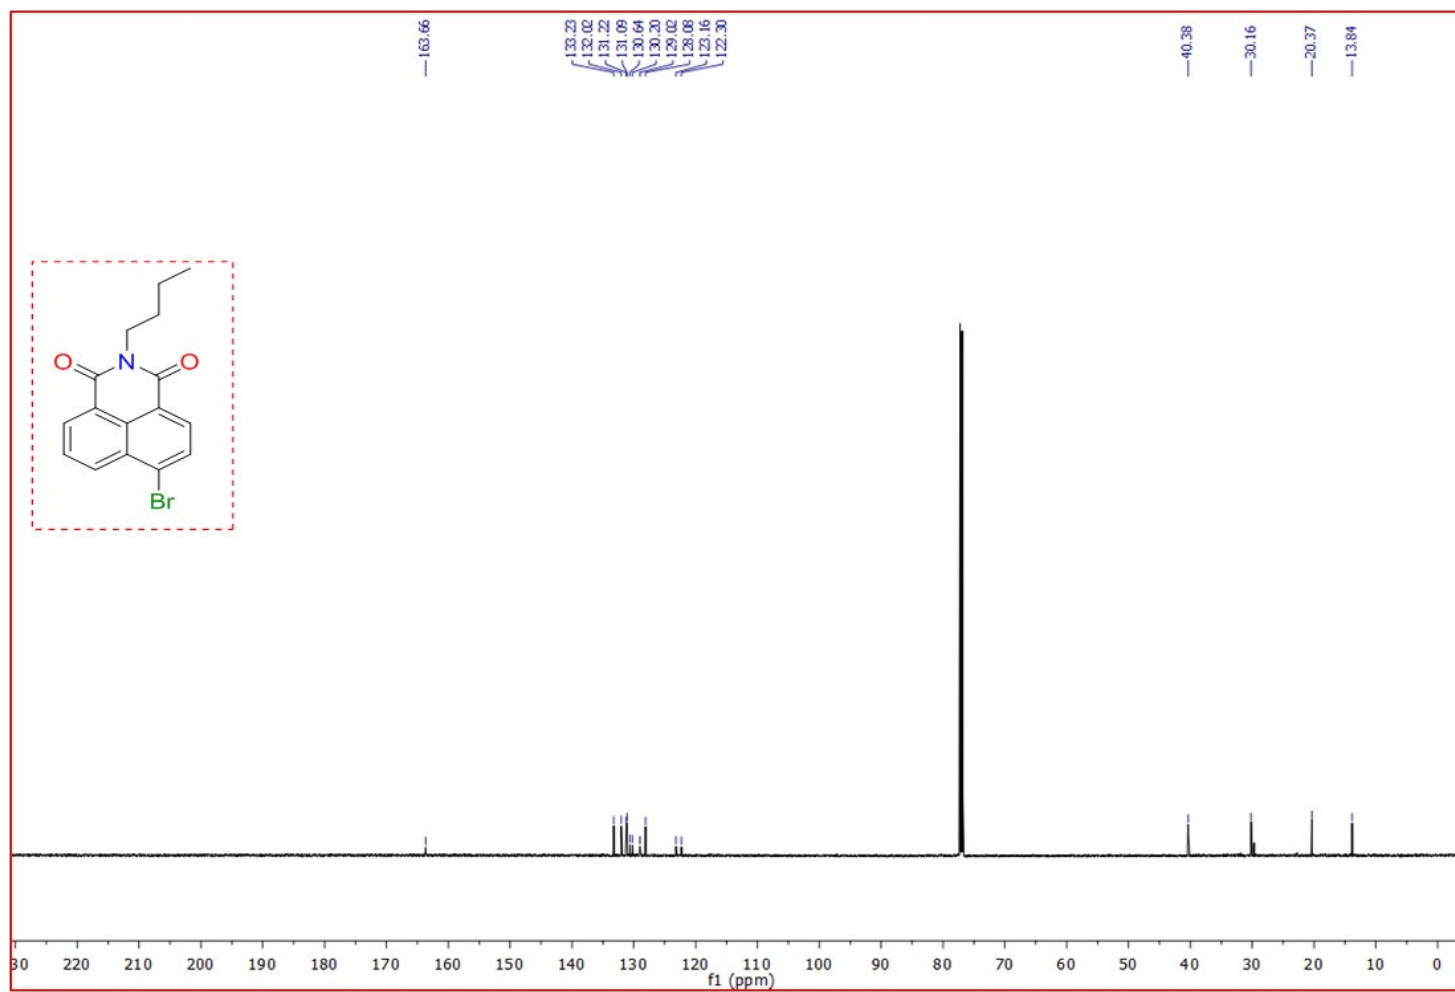

**Fig S2.**  $^{13}\text{C}$ -NMR spectrum of the compound **2a** in  $\text{CDCl}_3-d_6$



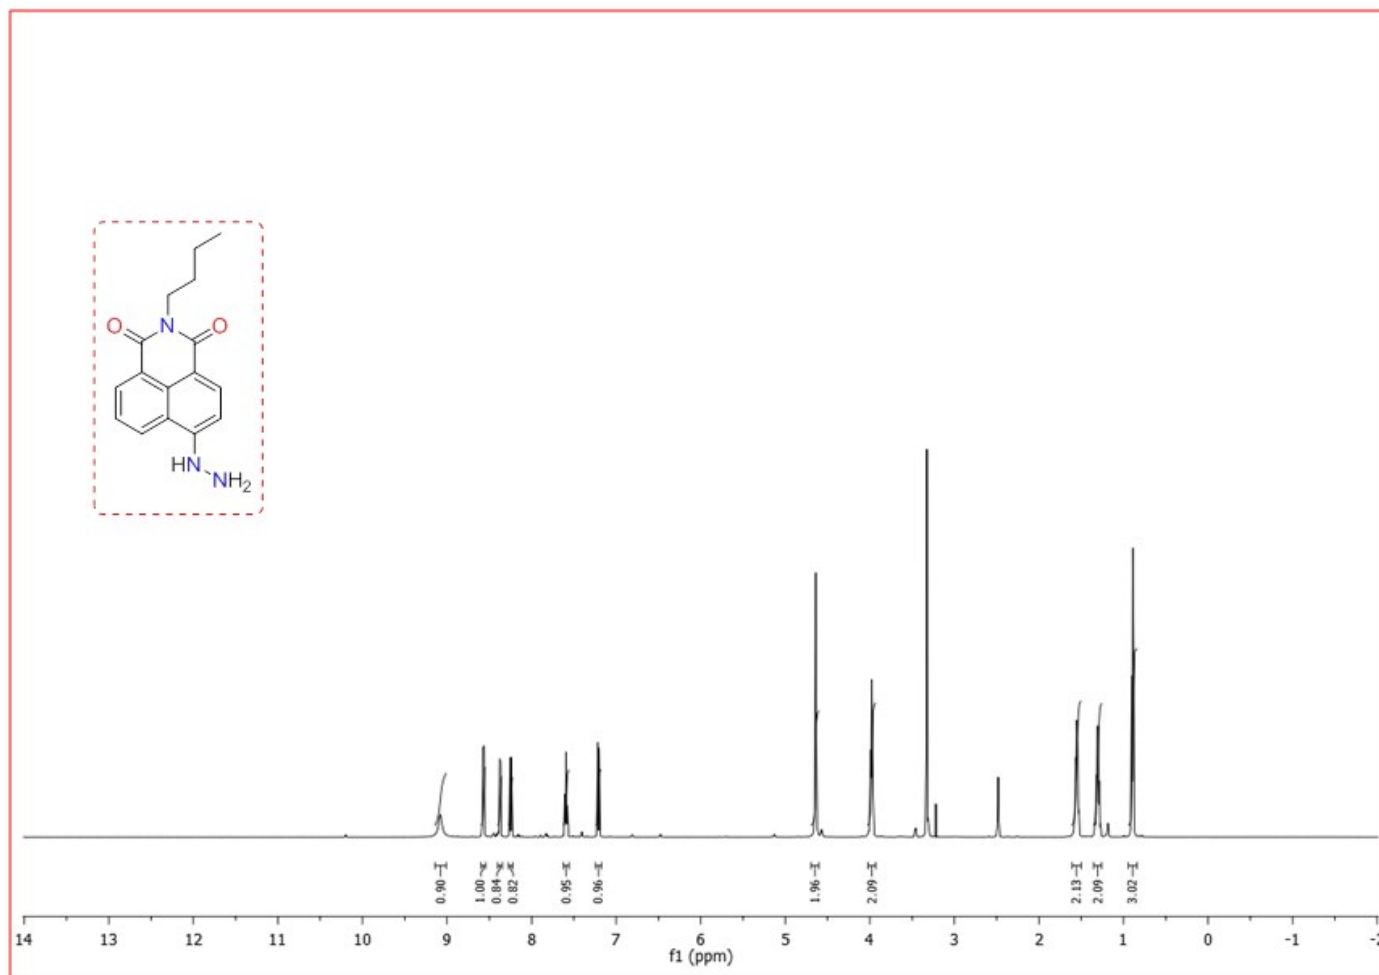

**Fig S3.**  $^1\text{H-NMR}$  spectrum of the compound **3a** in  $\text{CDCl}_3-d_6$

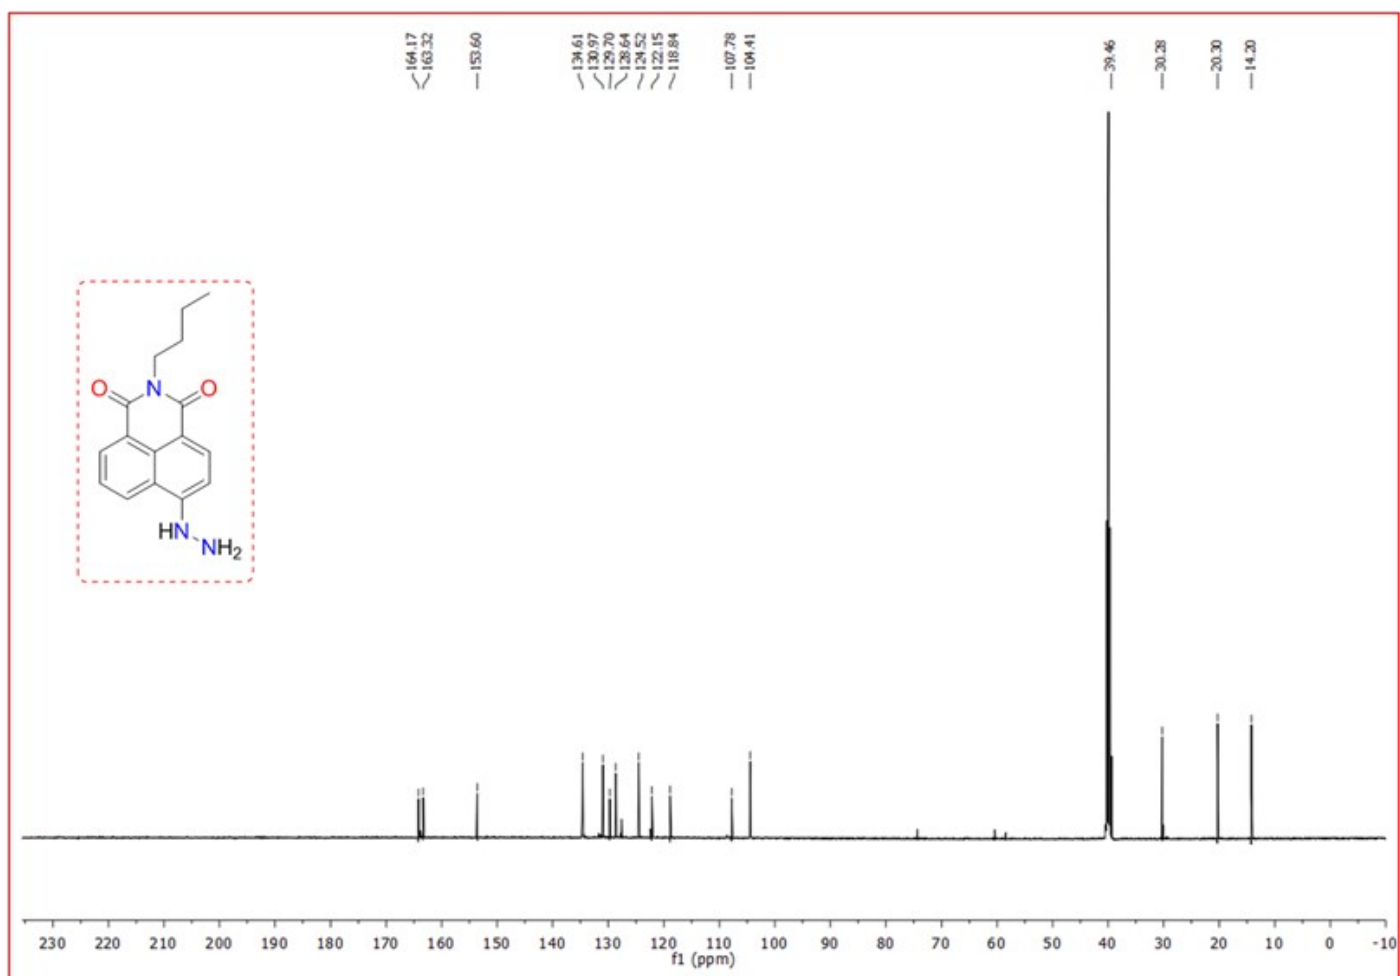

**Fig S4.**  $^{13}\text{C}$ -NMR spectrum of the compound **3a** in  $\text{CDCl}_3-d_6$

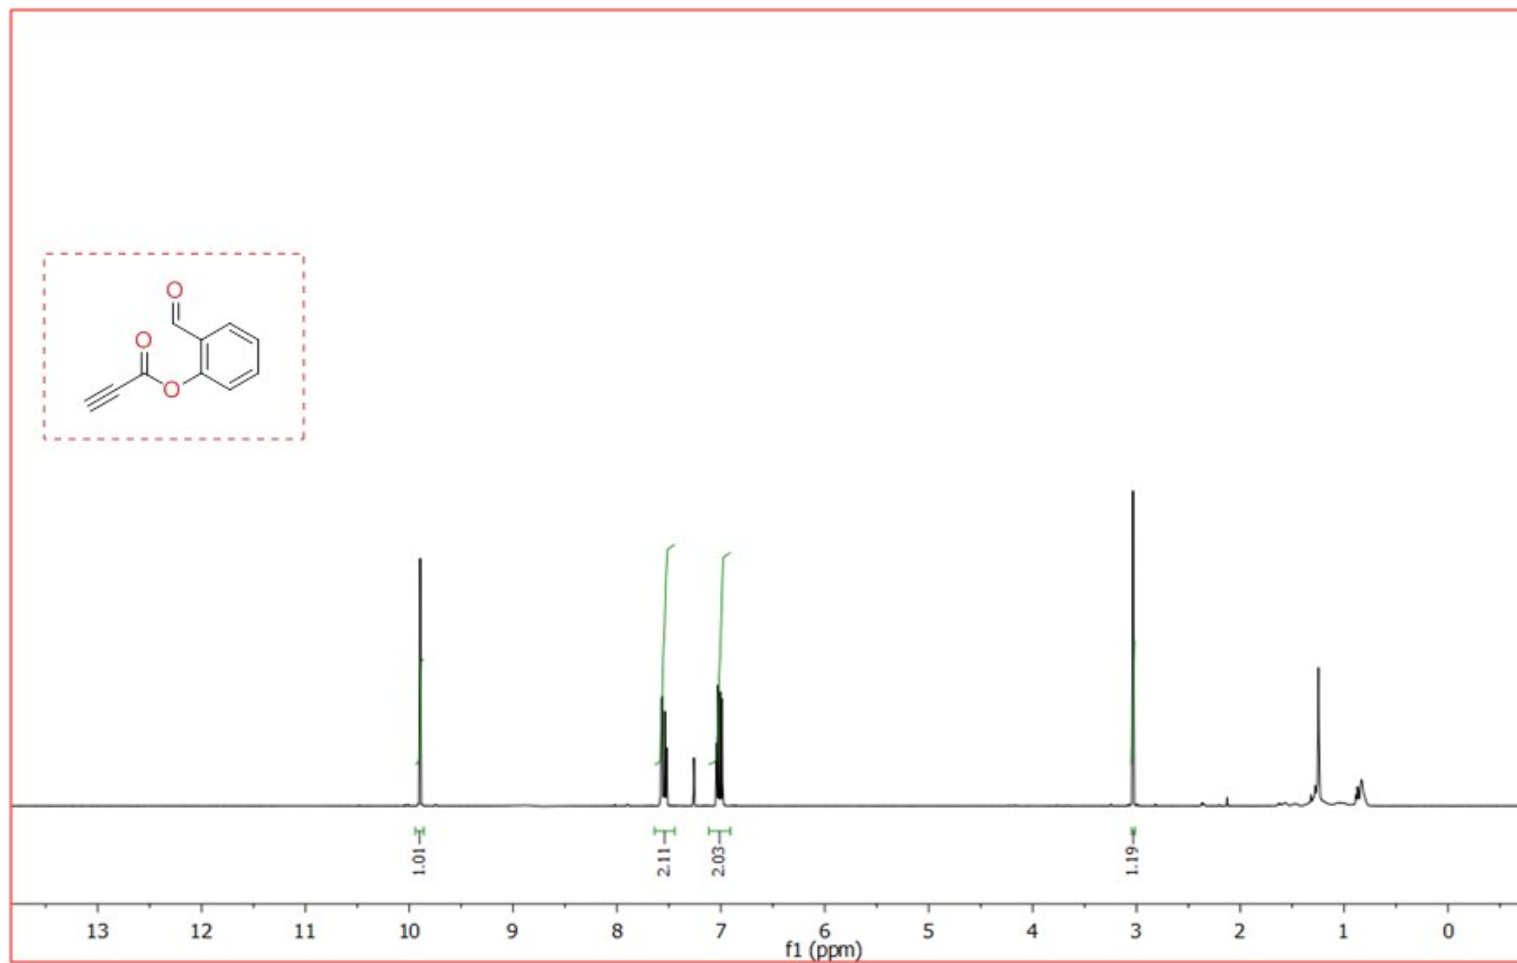

**Fig S5.**  $^1\text{H-NMR}$  spectrum of the compound **4a** in  $\text{CDCl}_3-d_6$

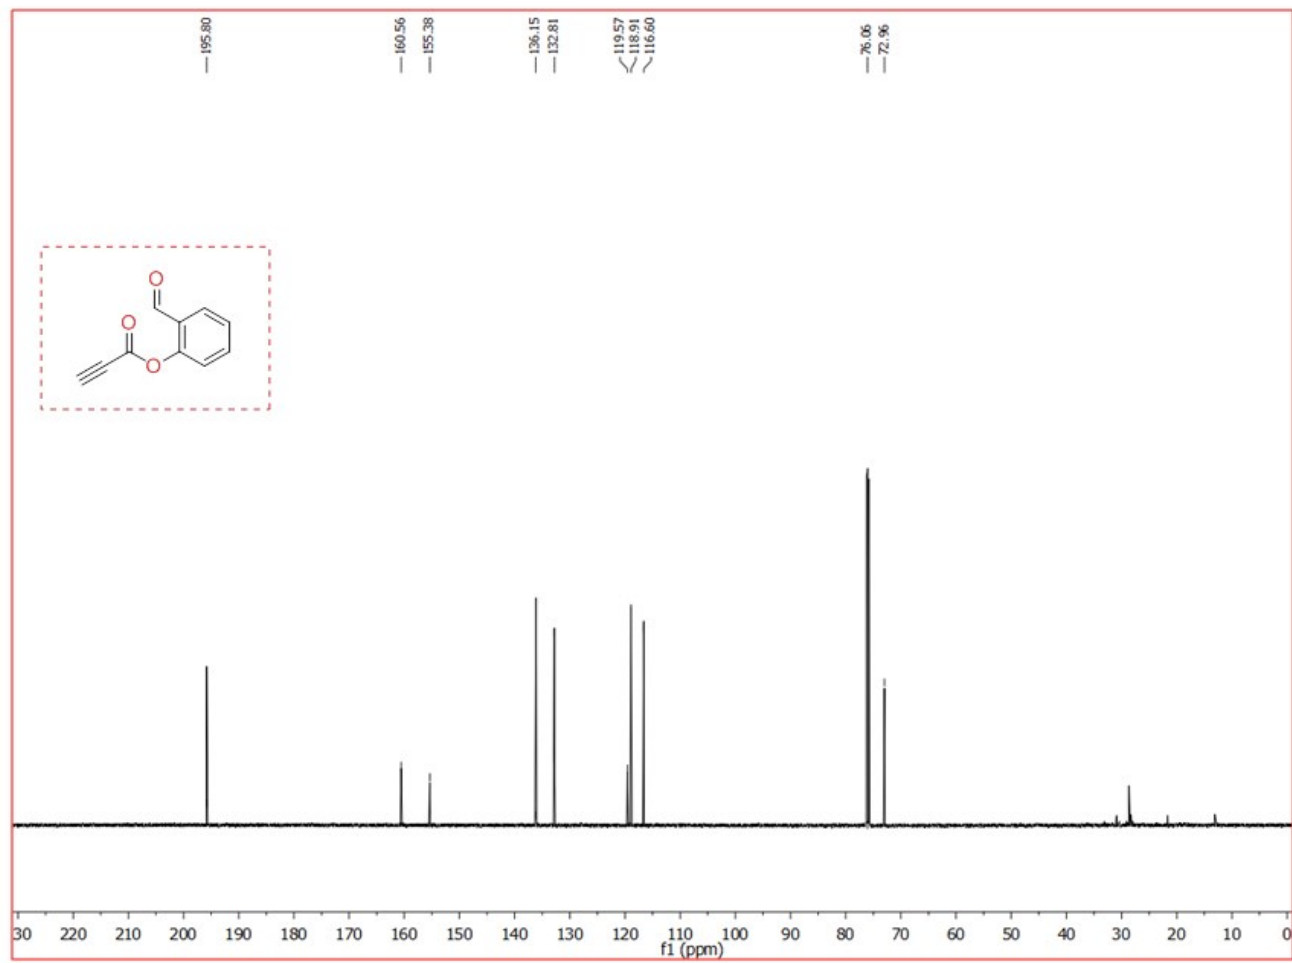

**Fig S6.**  $^{13}\text{C}$ -NMR spectrum of the compound **4a** in  $\text{CDCl}_3-d_6$

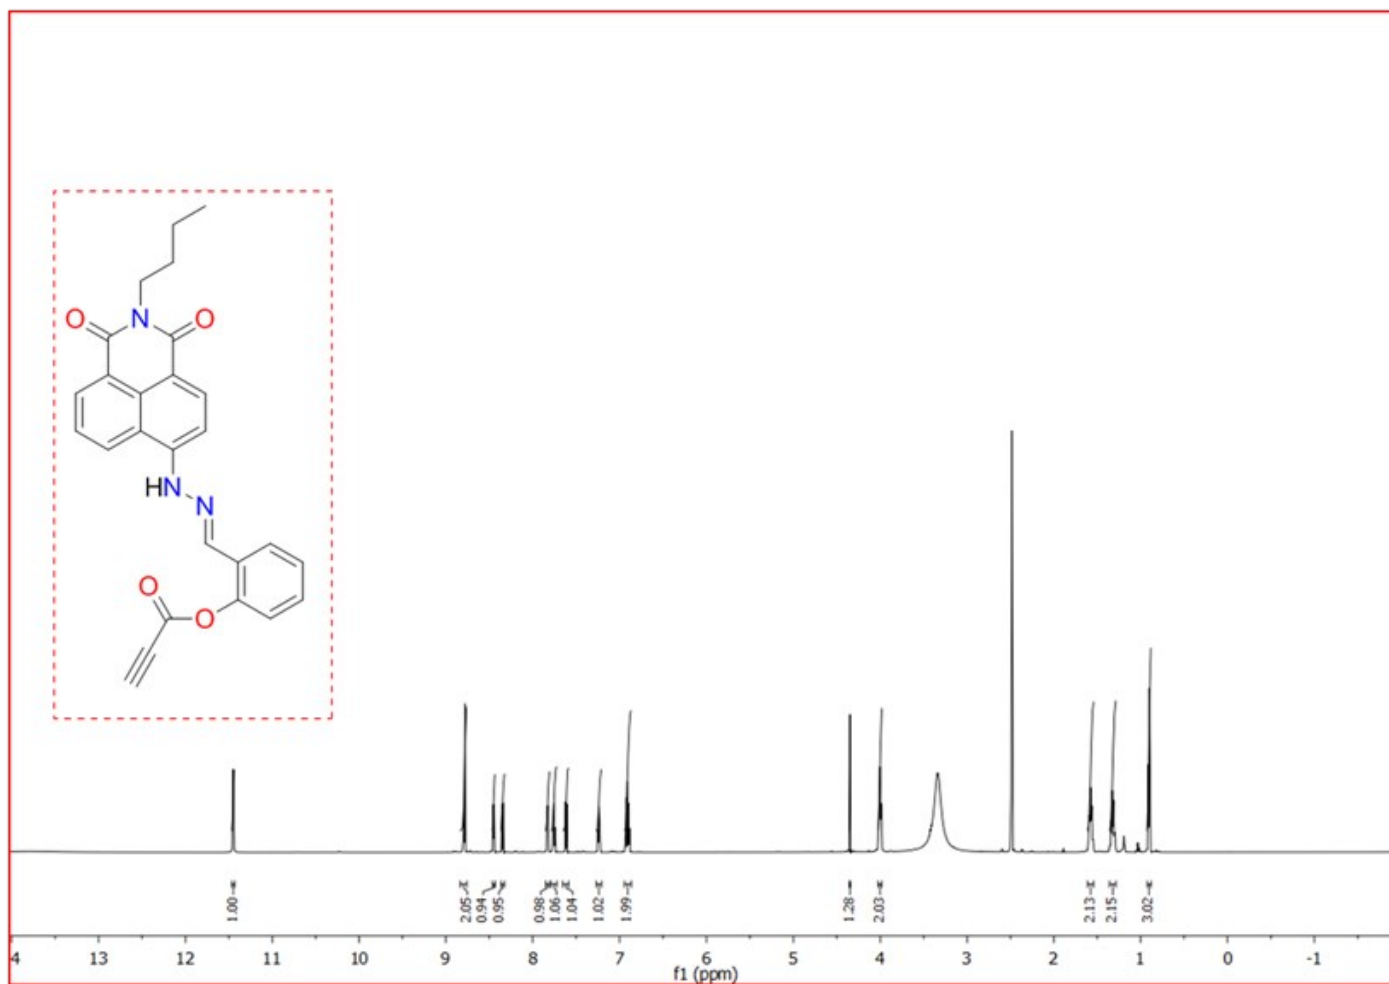

Fig S7. <sup>1</sup>H-NMR spectrum of the NASP in DMSO-*d*<sub>6</sub>

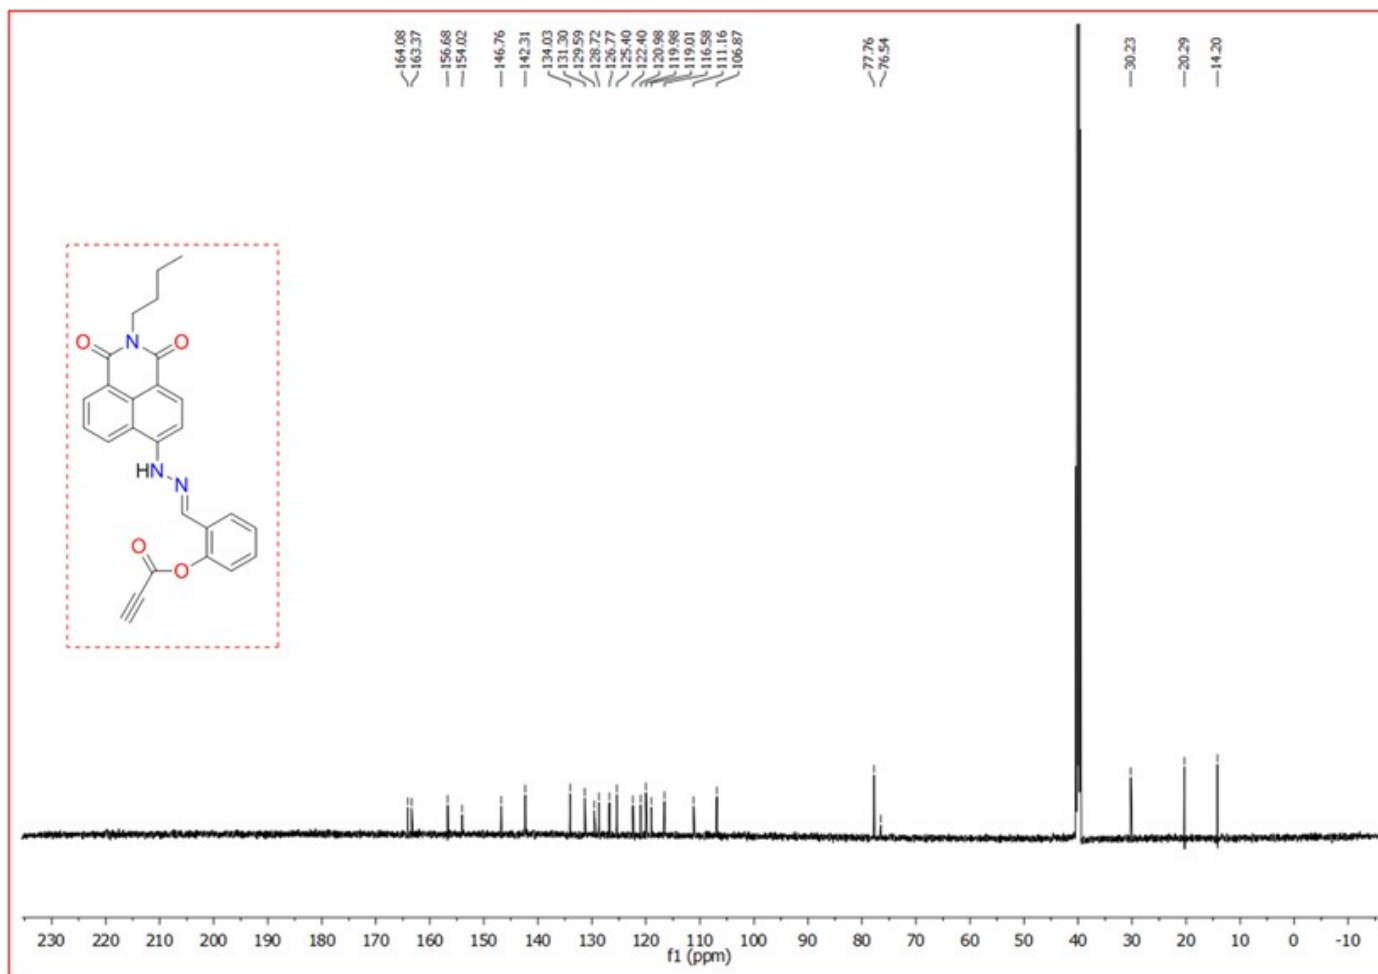

**Fig S8.**  $^{13}\text{C}$ -NMR spectrum of the NASP in  $\text{DMSO-}d_6$

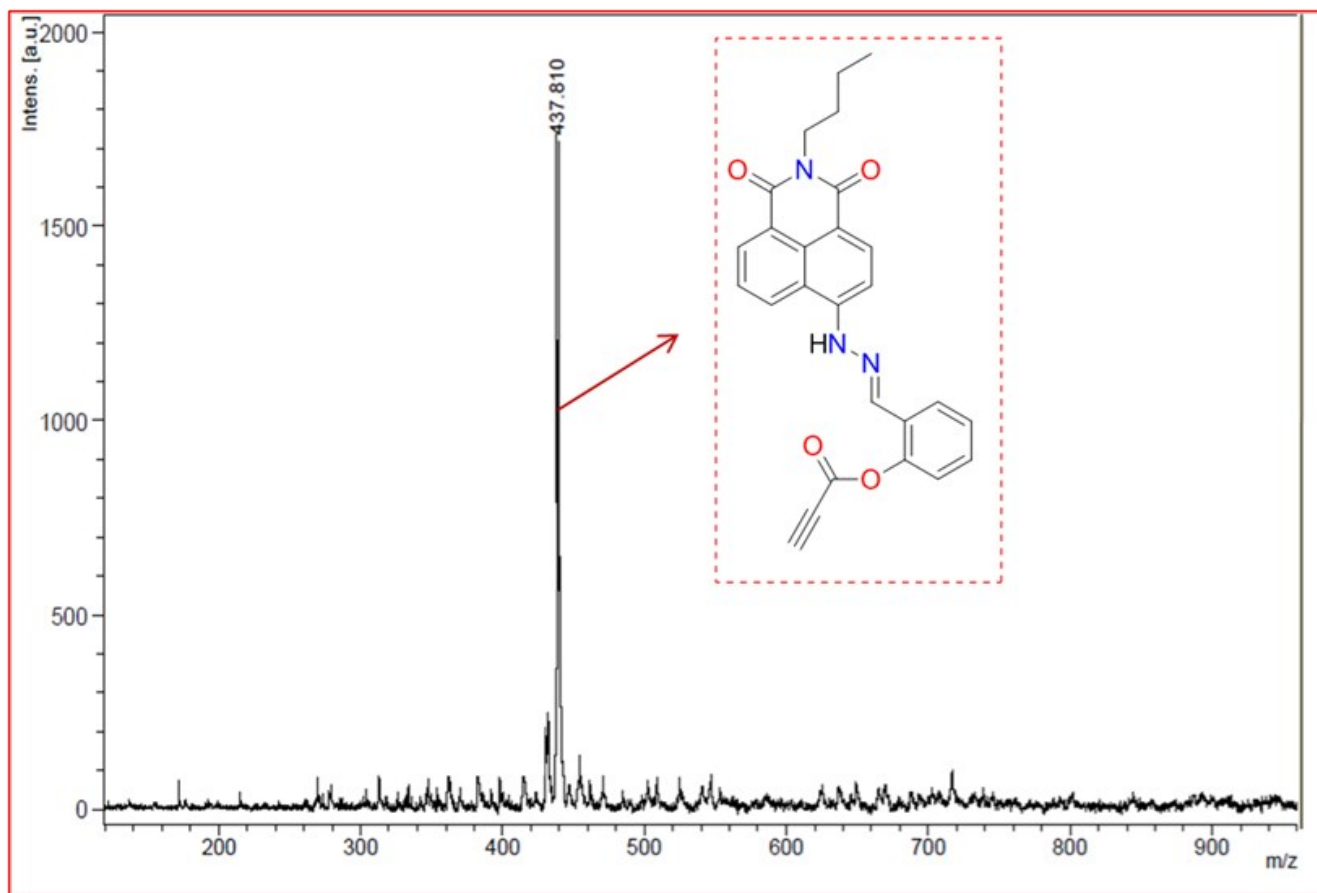

**Fig S9.** MALDI-TOF MS spectra of the NASP

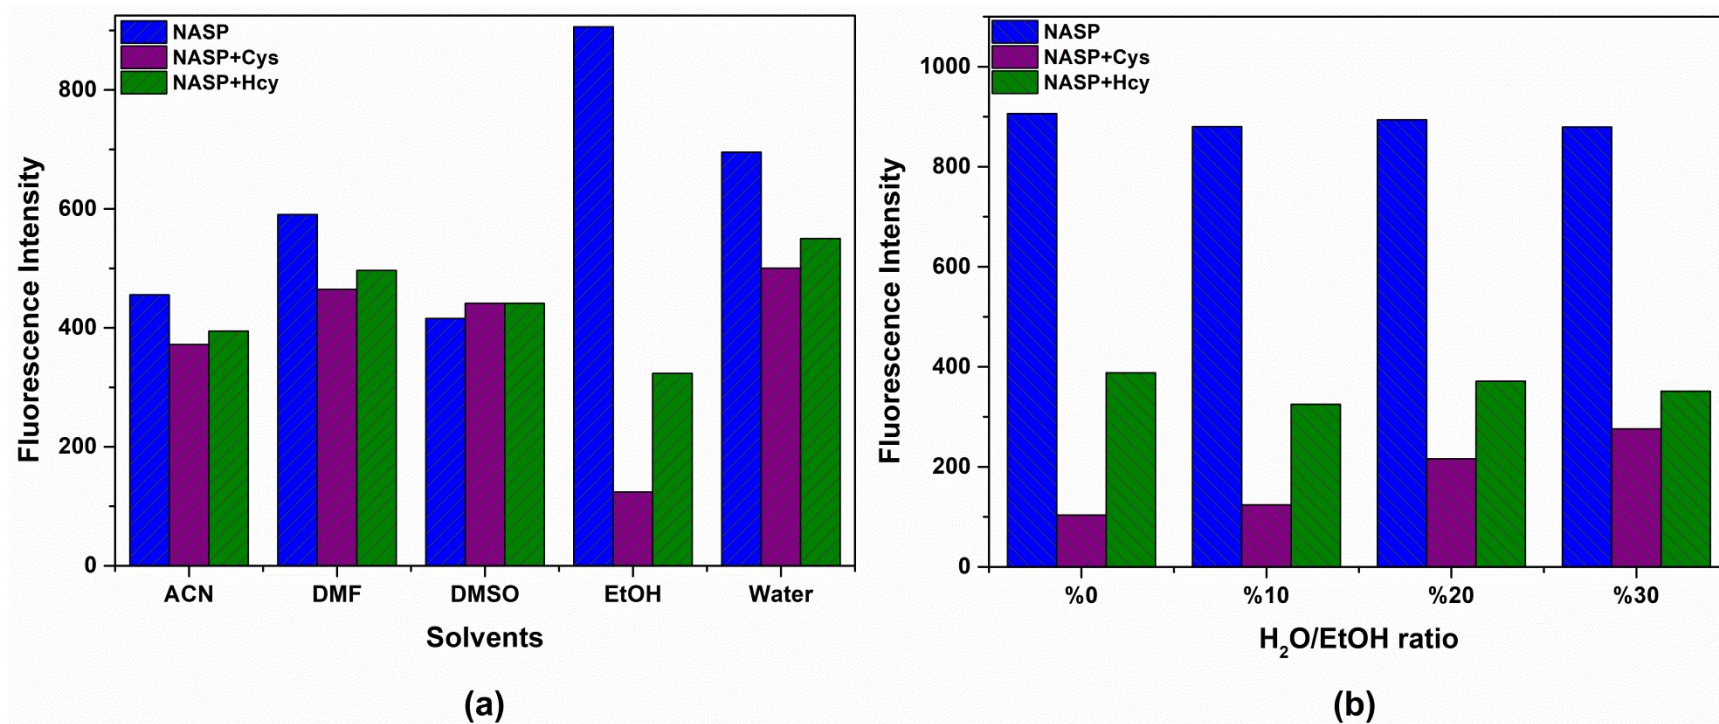

**Fig S10.** The fluorescence emission spectra of the **NASP**, **NASP–Cys** and **NASP–Hcy** **(a)** in different solvents and **(b)** EtOH–water mixture study in different ratios for the **NASP** in the presence and absence of Cys or Hcy



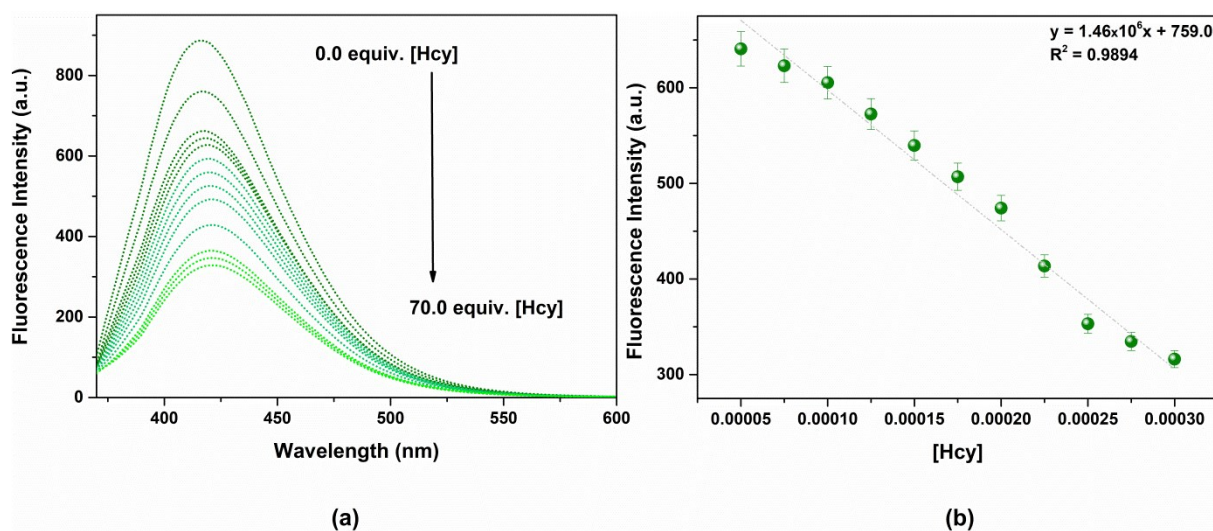

**Fig S11.** Spectra of the **NASP** (5.0 μM) in the presence of Hcy (0.0–70.0 equiv) in EtOH:H<sub>2</sub>O (90:10, v:v, 0.0670 M PBS buffer pH=7.0) media, LOD plot of the **NASP** versus Hcy concentrations.

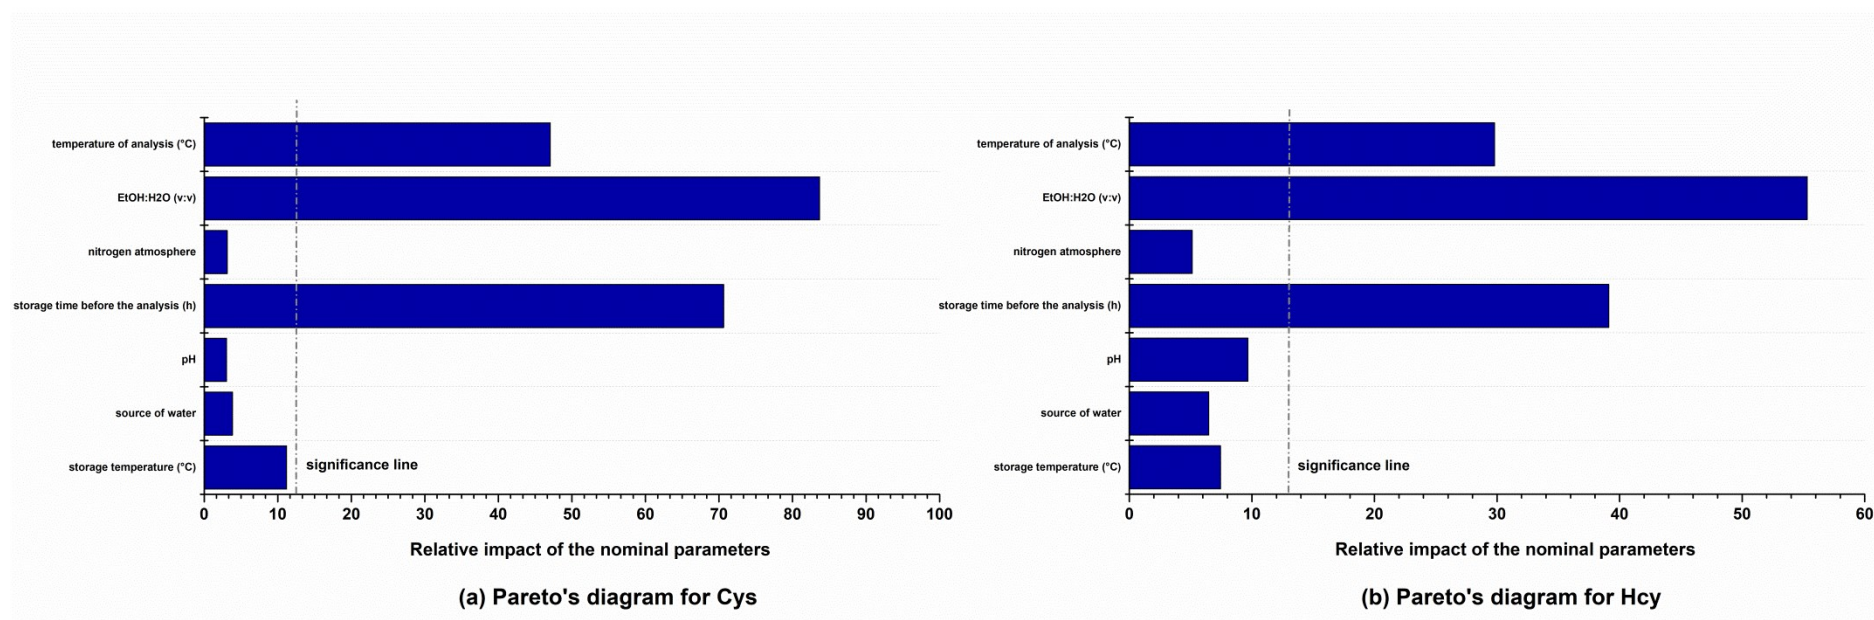

**Fig S12.** Pareto's diagram of the proposed method for Cys and Hcy

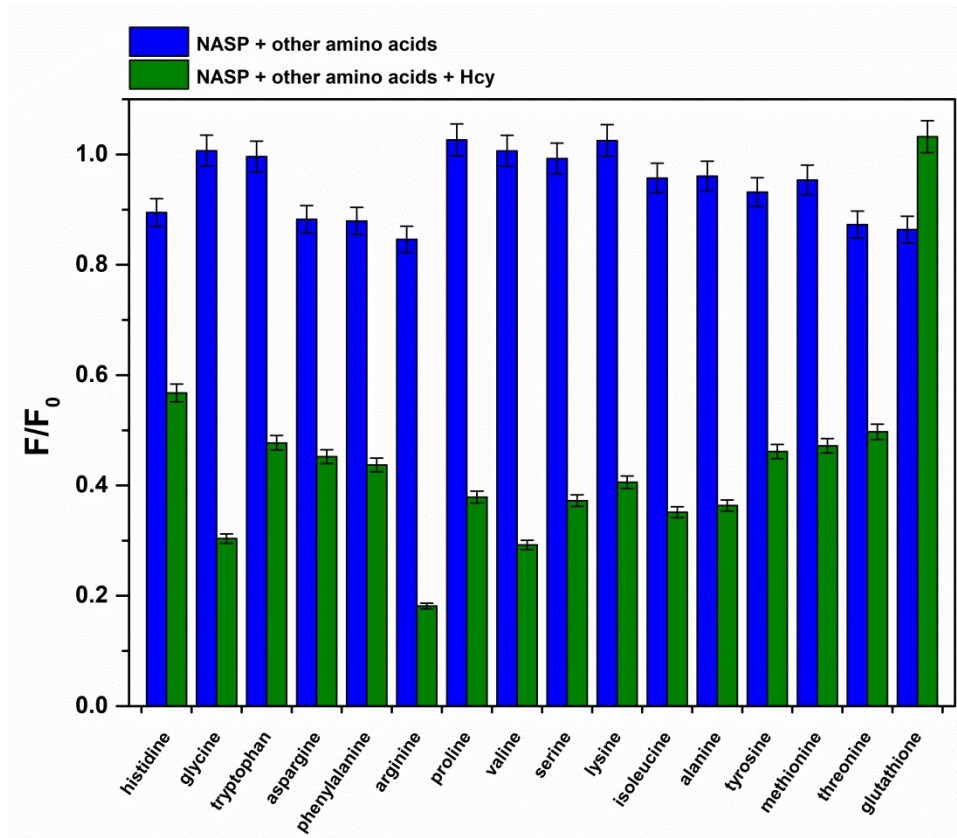

**Fig S13.** The emission intensity of the chemoprobe **NASP** (**5.0  $\mu\text{M}$** ) with competitive amino acids (*Asn, Trp, Phe, Ser, Thr, Met, Pro, Gly, Tyr, Val, Ala, Lys, Arg, His, Ile, GSH*)(**70 equiv., 0.350 mM**) (blue bar) and the emission intensity of **NASP** (**5.0  $\mu\text{M}$** ) in the presence of and **70 equiv. other competitive analytes** and **70 equiv. Hcy** (**0.350 mM**) in EtOH:H<sub>2</sub>O (90:10, v:v, 0.0670 M PBS buffer pH=7.0) media

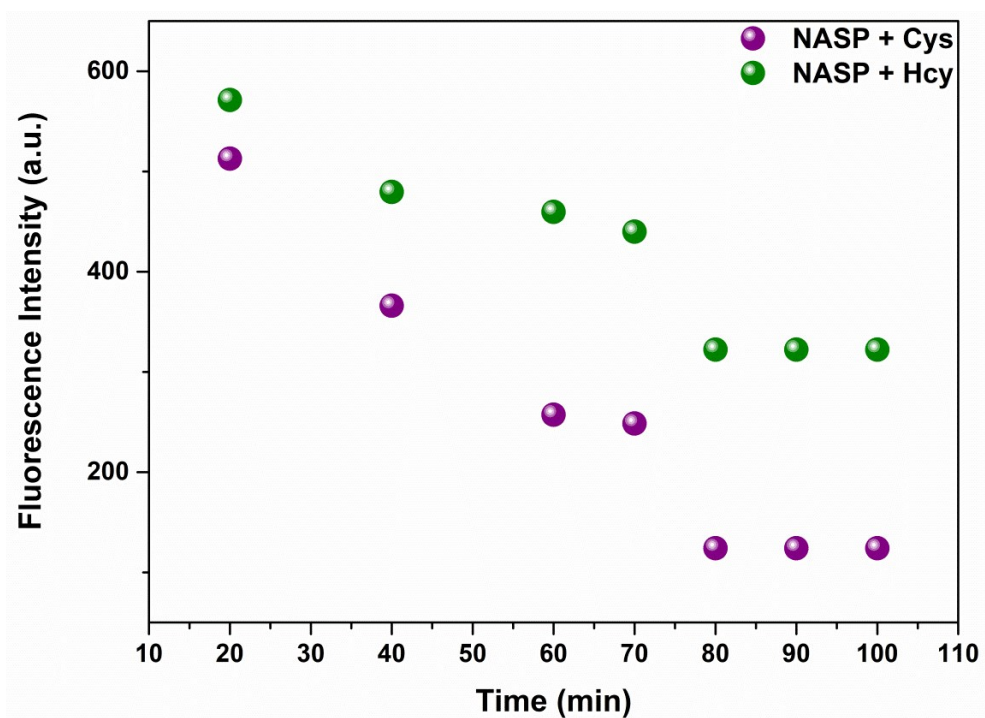

**Fig S14.** Response time experiments of the chemoprobe **NASP** (5.0  $\mu\text{M}$ ) in the presence of Cys, and Hcy in EtOH:H<sub>2</sub>O (90:10, v:v, 0.0670 M PBS buffer pH=7.0) media

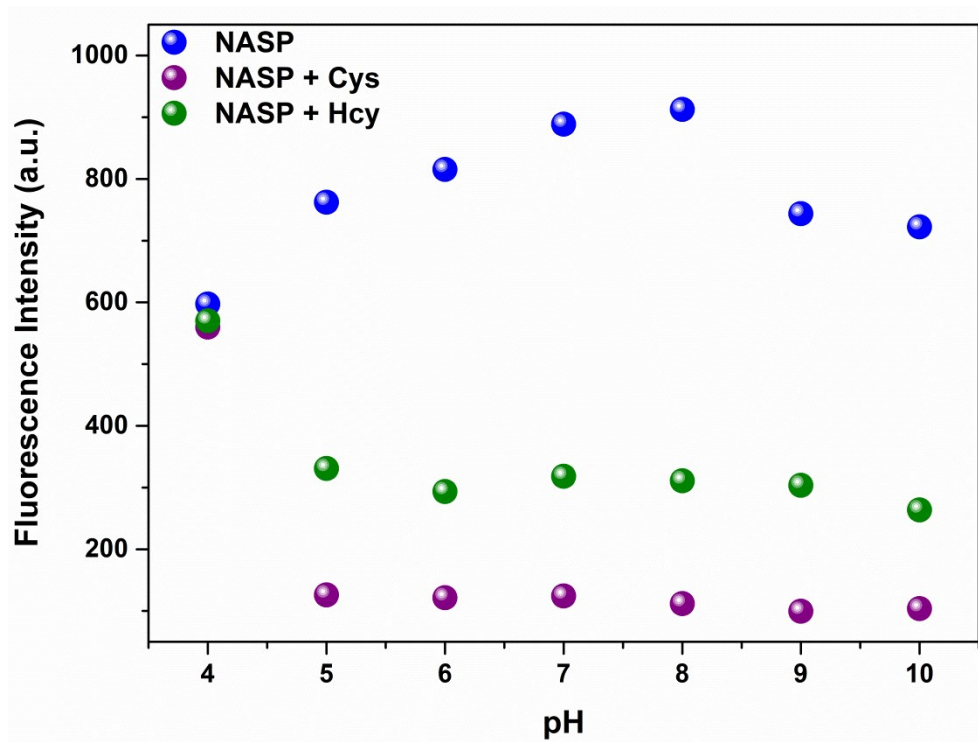

Fig S15. pH study of the **NASP** with or without Cys/Hcy in EtOH:H<sub>2</sub>O (90:10, v:v, 0.0670 M PBS buffer pH=7.0) media

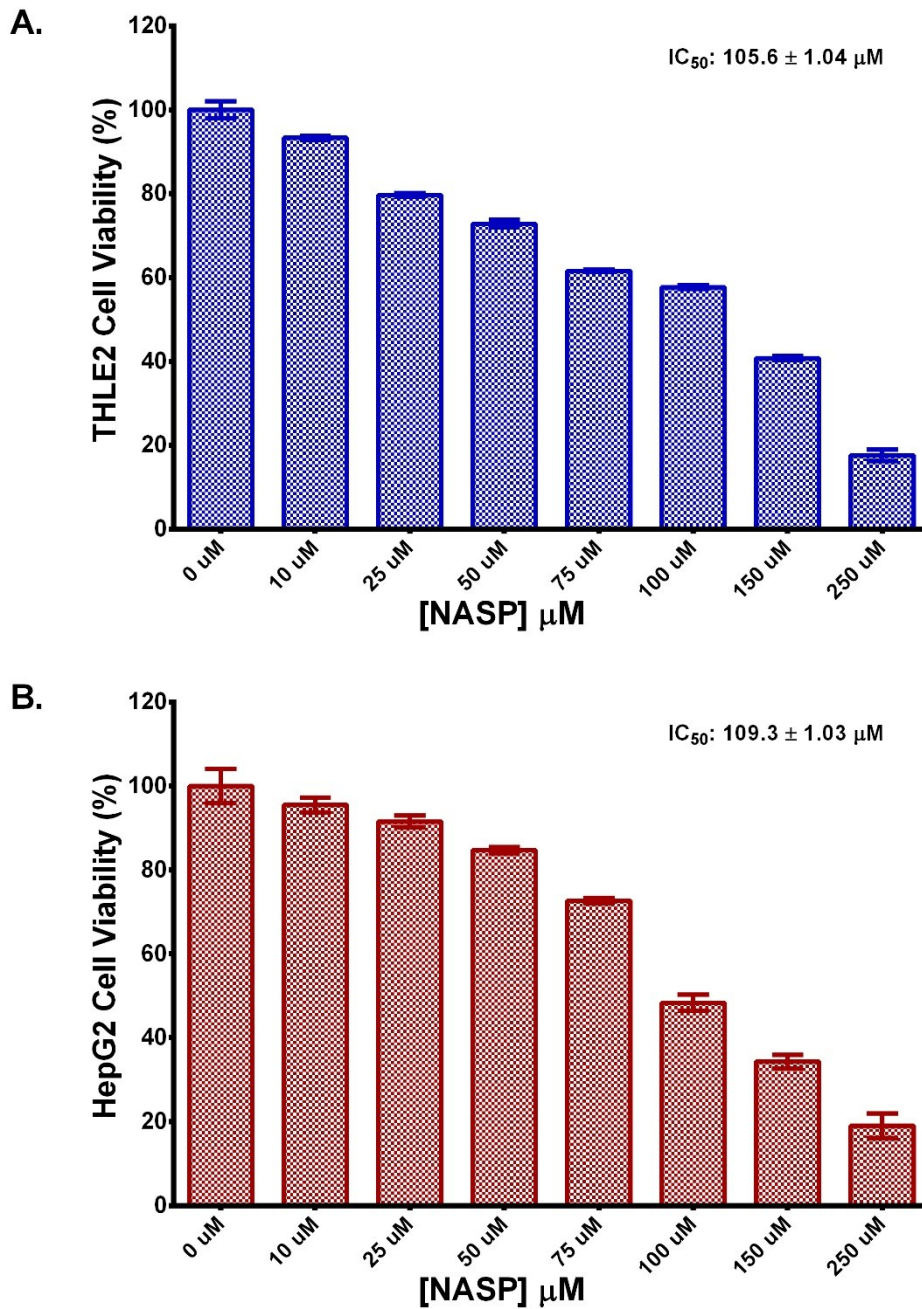

**Fig S16.** In vitro cytotoxic effects of NASP on THLE2 (**a**) and HepG2 (**b**) cells for 24-h incubation. Data presented the mean of at least triplicate measurements and given as mean  $\pm$  standard error of the mean. The  $\text{IC}_{50}$  value for the 24-h incubation was calculated as  $105.6 \pm 1.04 \mu\text{M}$  for THLE2 cells and  $109.3 \pm 1.03 \mu\text{M}$  for HepG2 cells.

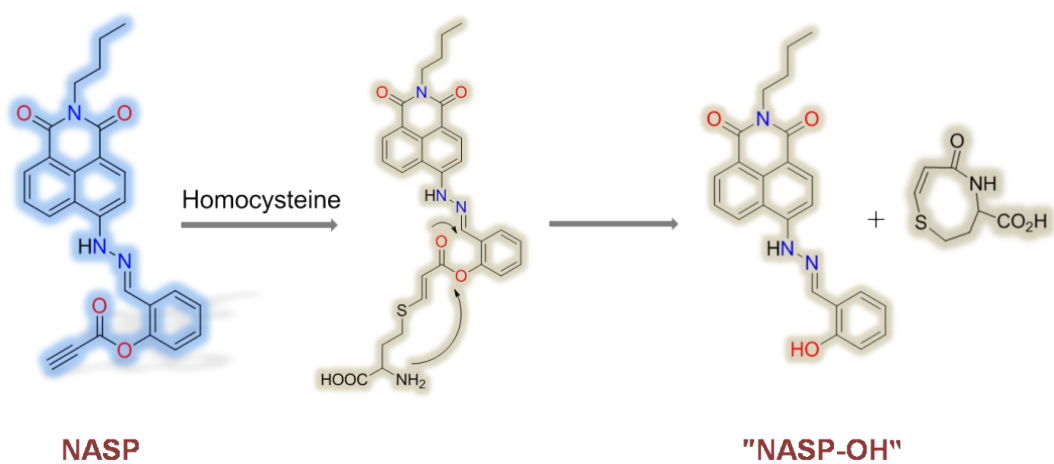

**Scheme S1.** Proposed mechanism for the recognition of homocysteine

**Table S1.** Nominal parameters specified during the assessment of the proposed method for Cys and Hcy

---

|                                    |                                                                 |
|------------------------------------|-----------------------------------------------------------------|
| slit of excitation                 | 10 nm                                                           |
| slit of emission                   | 10 nm                                                           |
| monitored wavelength               | $\lambda_{\text{ex}}=360$ nm, $\lambda_{\text{em}}=416$ nm      |
| photomultiplier tube (PMT) voltage | 600 Volt                                                        |
| temperature                        | rt                                                              |
| pH                                 | 0.0670 M PBS buffer pH=7.0 (EtOH:H <sub>2</sub> O (90:10, v:v)) |

---



**Table S2.** Parameters used in the robustness analysis of the proposed method for Cys and Hcy

|   | parameters                           | situation   |             |
|---|--------------------------------------|-------------|-------------|
|   |                                      | nominal (+) | Changed (-) |
| 1 | storage temperature (°C)             | 37.5        | 25          |
| 2 | source of water                      | ultrapure   | distilled   |
| 3 | pH                                   | 7.0         | 5.0         |
| 4 | storage time before the analysis (h) | 16          | 24          |
| 5 | nitrogen atmosphere                  | no          | yes         |
| 6 | EtOH:H <sub>2</sub> O (v:v)          | 90 / 10     | 80 / 20     |
| 7 | temperature of analysis (°C)         | 25          | 15          |

**Table S3.** Factorial combinations used in the Youden test of robustness analysis of the proposed method for Cys and Hcy

| Parameter<br>\ $C_i$ | $C_1$ | $C_2$ | $C_3$ | $C_4$ | $C_5$ | $C_6$ | $C_7$ | $C_8$ |
|----------------------|-------|-------|-------|-------|-------|-------|-------|-------|
| 1                    | +     | +     | +     | +     | -     | -     | -     | -     |
| 2                    | +     | +     | -     | -     | +     | +     | -     | -     |
| 3                    | +     | -     | +     | -     | +     | -     | +     | -     |
| 4                    | +     | +     | -     | -     | -     | -     | +     | +     |
| 5                    | +     | -     | +     | -     | -     | +     | -     | +     |
| 6                    | +     | -     | -     | +     | +     | -     | -     | +     |
| 7                    | +     | -     | -     | +     | -     | +     | +     | -     |

**Table S4.** Dixon's test utilized to the repeatability of the proposed method for Cys and Hcy

|     | concentration        | average values ( $\bar{x}$ ) |        |        | highest value of emission | $Q_{value}$ | lowest value of emission | $Q_{value}$ |
|-----|----------------------|------------------------------|--------|--------|---------------------------|-------------|--------------------------|-------------|
|     |                      | 16h                          | 20h    | 24h    |                           |             |                          |             |
| Cys | $1 \times 10^{-5}$ M | 91.60                        | 99.40  | 111.24 | 111.24                    | <b>0.60</b> | 91.60                    | <b>0.40</b> |
|     | $2 \times 10^{-5}$ M | 75.25                        | 77.67  | 87.07  | 87.07                     | <b>0.80</b> | 75.25                    | <b>0.20</b> |
| Hcy | $1 \times 10^{-5}$ M | 75.29                        | 75.31  | 78.11  | 78.11                     | <b>0.07</b> | 75.29                    | <b>0.93</b> |
|     | $2 \times 10^{-5}$ M | 179.69                       | 172.43 | 175.21 | 179.69                    | <b>0.80</b> | 172.43                   | <b>0.20</b> |

<sup>†</sup> $Q_{critical} = 0.970$

**Table S5.** Intermediate precision analysis of the proposed method for Cys and Hcy verified by the HorRat ratio

|                           |                       | Cys         |             |                          | Hcy         |             |                          |
|---------------------------|-----------------------|-------------|-------------|--------------------------|-------------|-------------|--------------------------|
|                           |                       | analyst (1) | analyst (2) | $F_{calculated}$         | analyst (1) | analyst (2) | $F_{calculated}$         |
| 16 h $1 \times 10^{-5}$ M | Average ( $\bar{x}$ ) | 91.60       | 92.49       |                          | 75.30       | 78.86       |                          |
|                           | SD                    | 0.13        | 0.12        |                          | 0.15        | 0.12        |                          |
|                           | RSD (%)               | 0.14        | 0.13        | <b>1.29</b>              | 0.2         | 0.15        | <b>1.76</b>              |
|                           | RSD Horwitz (%)       | 7.58        | 7.58        | $F_{cal} < F_{critical}$ | 7.58        | 7.58        | $F_{cal} < F_{critical}$ |
|                           | HorRat ratio          | <b>0.02</b> | <b>0.02</b> |                          | 0.03        | 0.02        |                          |
| 16 h $2 \times 10^{-5}$ M | Average ( $\bar{x}$ ) | 75.25       | 79.14       |                          | 179.69      | 176.10      |                          |
|                           | SD                    | 0.14        | 0.12        |                          | 0.13        | 0.19        |                          |
|                           | RSD (%)               | 0.19        | 0.15        | <b>1.56</b>              | 0.07        | 0.11        | <b>2.34</b>              |
|                           | RSD Horwitz (%)       | 6.83        | 6.83        | $F_{cal} < F_{critical}$ | 6.83        | 6.83        | $F_{cal} < F_{critical}$ |
|                           | HorRat ratio          | <b>0.03</b> | <b>0.02</b> |                          | 0.01        | 0.02        |                          |
| 20 h $1 \times 10^{-5}$ M | Average ( $\bar{x}$ ) | 99.40       | 91.94       |                          | 75.30       | 79.20       |                          |
|                           | SD                    | 0.19        | 0.17        |                          | 0.13        | 0.11        |                          |
|                           | RSD (%)               | 0.19        | 0.18        | <b>1.08</b>              | 0.18        | 0.14        | <b>1.56</b>              |
|                           | RSD Horwitz (%)       | 7.58        | 7.58        | $F_{cal} < F_{critical}$ | 7.58        | 7.58        | $F_{cal} < F_{critical}$ |
|                           | HorRat ratio          | <b>0.03</b> | <b>0.02</b> |                          | 0.02        | 0.02        |                          |
| 20 h $2 \times 10^{-5}$ M | Average ( $\bar{x}$ ) | 77.67       | 76.53       |                          | 172.43      | 176.43      |                          |
|                           | SD                    | 0.21        | 0.20        |                          | 0.11        | 0.16        |                          |
|                           | RSD (%)               | 0.27        | 0.27        | <b>1.02</b>              | 0.07        | 0.09        | <b>1.89</b>              |
|                           | RSD Horwitz (%)       | 6.83        | 6.83        | $F_{cal} < F_{critical}$ | 6.83        | 6.83        | $F_{cal} < F_{critical}$ |
|                           | HorRat ratio          | <b>0.04</b> | <b>0.04</b> |                          | 0.01        | 0.01        |                          |
| 24 h $1 \times 10^{-5}$ M | Average ( $\bar{x}$ ) | 111.24      | 117.77      |                          | 78.11       | 78.18       |                          |
|                           | SD                    | 0.15        | 0.10        |                          | 0.09        | 0.07        |                          |
|                           | RSD (%)               | 0.14        | 0.08        | <b>2.83</b>              | 0.12        | 0.1         | <b>1.46</b>              |
|                           | RSD Horwitz (%)       | 7.58        | 7.58        | $F_{cal} < F_{critical}$ | 7.58        | 7.58        | $F_{cal} < F_{critical}$ |
|                           | HorRat ratio          | <b>0.02</b> | <b>0.01</b> |                          | 0.02        | 0.01        |                          |
| 24 h $2 \times 10^{-5}$ M | Average ( $\bar{x}$ ) | 108.4356    | 103.62      |                          | 175.21      | 173.04      |                          |
|                           | SD                    | 0.13        | 0.14        |                          | 0.14        | 0.14        |                          |
|                           | RSD (%)               | 0.12        | 0.14        | <b>1.28</b>              | 0.08        | 0.08        | <b>1.03</b>              |
|                           | RSD Horwitz (%)       | 6.83        | 6.83        | $F_{cal} < F_{critical}$ | 6.83        | 6.83        | $F_{cal} < F_{critical}$ |
|                           | HorRat ratio          | <b>0.02</b> | <b>0.02</b> |                          | 0.01        | 0.01        |                          |

<sup>†</sup>  $F_{critical}=2.98$
